# Supplementary material
Source: Springer Nature journal article supplement (https://www.springermedizin.de/resource/supplementary/13054_2011_552_MOESM11_ESM.pdf/9708758)

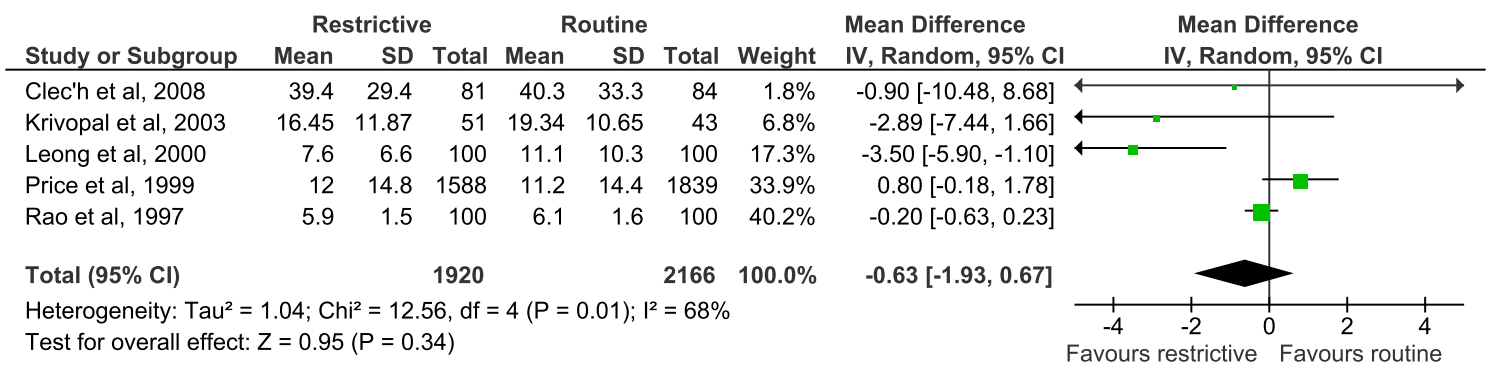

Supplement: MOESM11 [file 9708758]
